# Supplementary material
Source: PubMed Central journal article supplement (PMC3262954)
Supplement: NIHMS340720-supplement-1.pdf [file NIHMS340720-supplement-1.pdf]

**Table I:** Physiologic measurements of *Rag1*<sup>-/-</sup> and wildtype mice before, during, and following middle cerebral artery occlusion <sup>a</sup>

| Before Ischemia            |             |            |            |
|----------------------------|-------------|------------|------------|
|                            | MAP         | HR         | Temp       |
| <i>Rag1</i> <sup>-/-</sup> | 104.4±12.3  | 389.5±50.7 | 36.11±0.73 |
| Wildtype                   | 100.41±14.2 | 384.3±21.7 | 36.24±0.74 |
| During Ischemia            |             |            |            |
|                            | MAP         | HR         | Temp       |
| <i>Rag1</i> <sup>-/-</sup> | 98.8±6.7    | 381.8±24.2 | 36.05±0.61 |
| Wildtype                   | 92.3±14.4   | 399.8±34.5 | 35.98±0.56 |
| Post Ischemia              |             |            |            |
|                            | MAP         | HR         | Temp       |
| <i>Rag1</i> <sup>-/-</sup> | 95.1±12.7   | 394.6±31.5 | 36.16±0.52 |
| Wildtype                   | 98.8±13.9   | 423±34.6   | 35.98±0.88 |

<sup>a</sup> MAP, mean arterial (blood) pressure; HR, heart rate; Temp, temperature (in degrees Celsius). Results are shown as mean ± SD, n=10.
